# Supplementary material
Source: publisher figshare collection journal article supplement (https://sage.figshare.com/ndownloader/files/17763422)
Supplement: Supplementary file 1 [file 17763422]

Supplementary Material


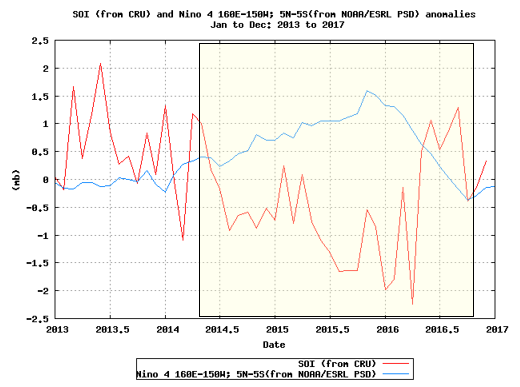


Figure S1. The SOI in the red line (from the Climatic Research Unit [CRU]) and the Niño 4 SST anomalies in the blue line (from NOAA/ESRL/PSD) from January 2013 to December 2017. The extent of the 2014-2016 ‘protracted’ El Niño episode is shown in transparent yellow shading (Source: Global Climate Observing System (GCOS) Working Group on Surface Pressure (WG-SP): Analyze & Plot Long Range Climate Time Series).


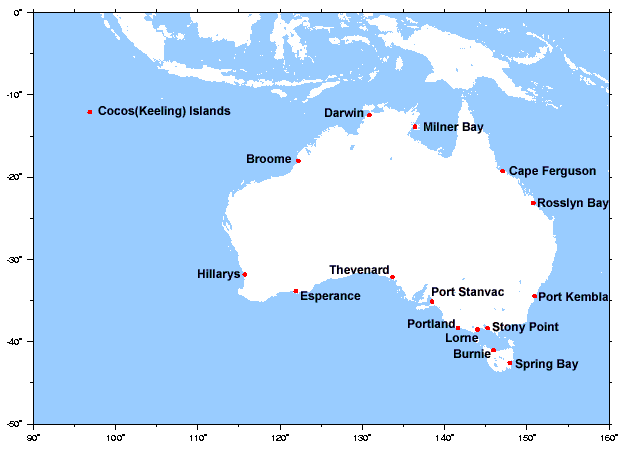


Figure S2. Australian Baseline Sea Level Monitoring Project SEAFRAME (SEA-Level Fine Resolution Acoustic Measuring Equipment) tide gauge stations. (Source: Australian Bureau of Meteorology, Australian Baseline Sea Level Monitoring Project: <http://www.bom.gov.au/oceanography/projects/abslmp/abslmp.shtml>).


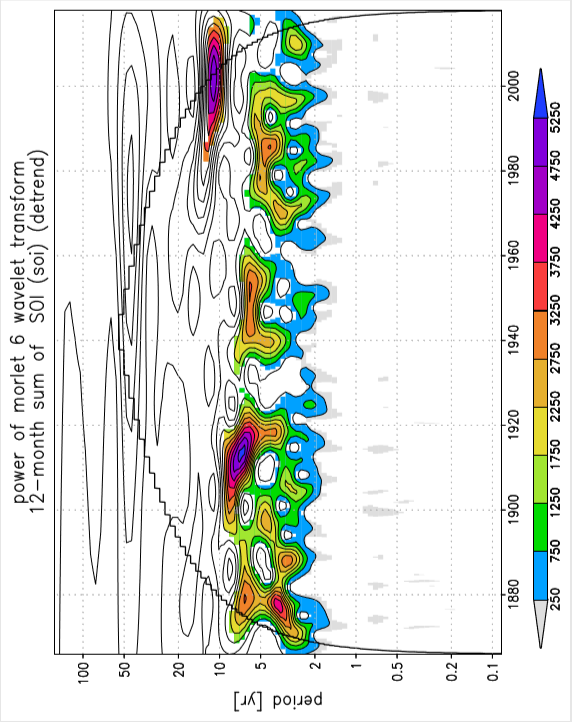

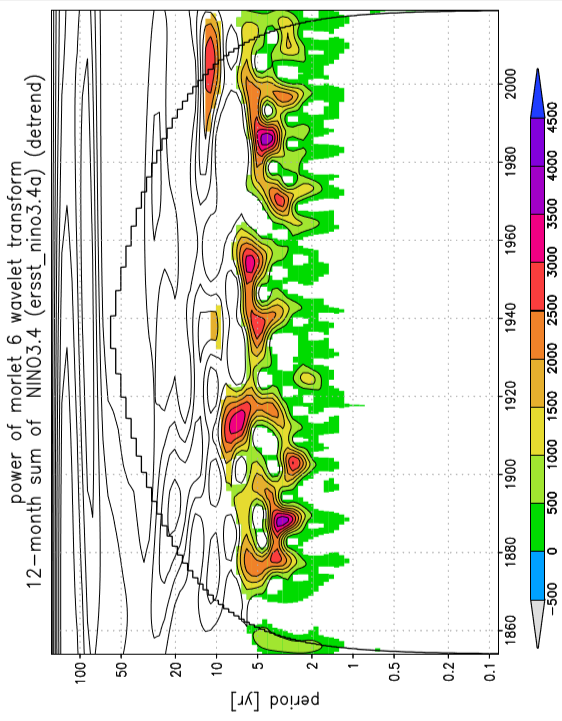

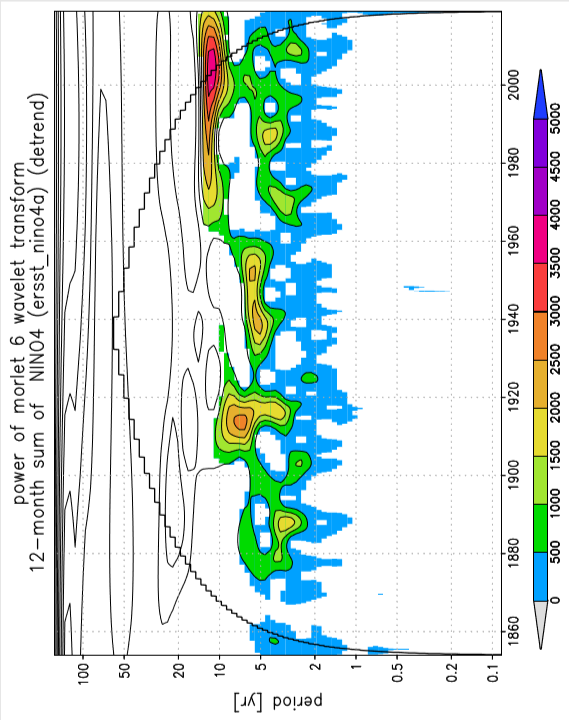

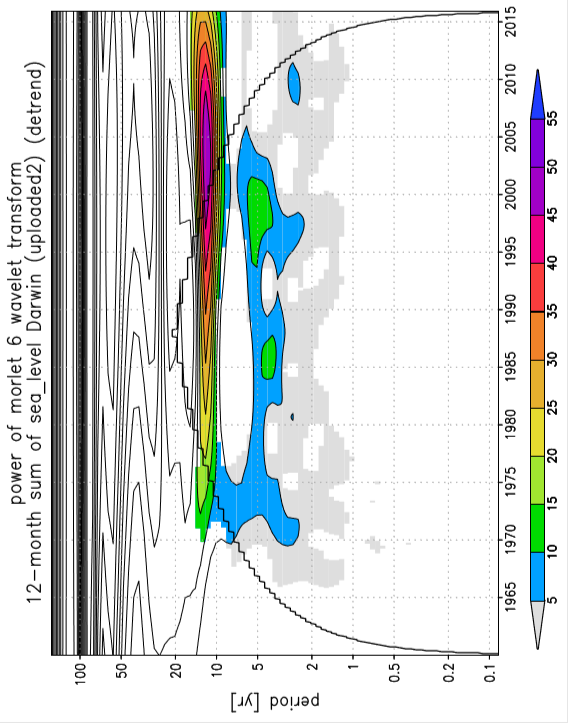


a

c

b

d


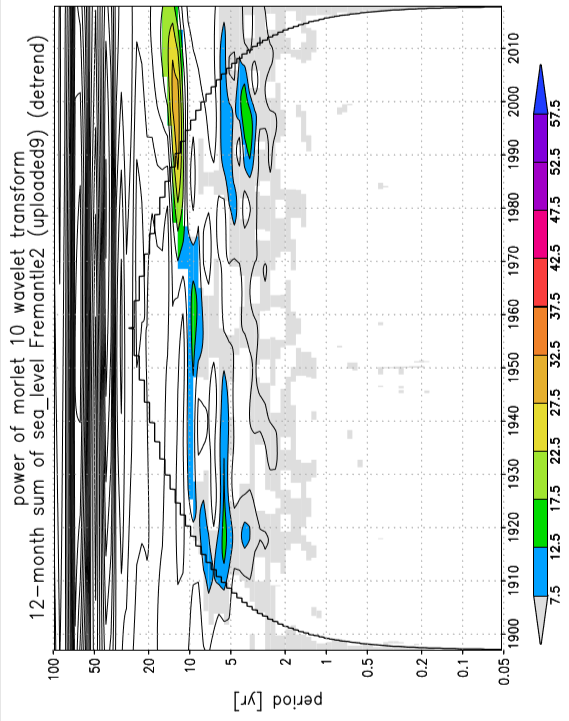


e

Figure S3. Power of Morlet 6 wave transform analysis of various instrumental ENSO measures and indices (a. the SOI [1866-2019], b. Niño 3.4 [1854-2019] and c. Niño 4 [1854-2019] SST anomalies) and sea level anomalies at two locations ontheAustralian coast (d. Darwin [1959-2016] and e. Fremantle [1897-2018]). Niño 3.4 and Niño 4 SSTs are from ERSSTv5. (Source: Generated using the KNMI Climate Explorer: <https://climexp.knmi.nl/start.cgi>).

A: SST


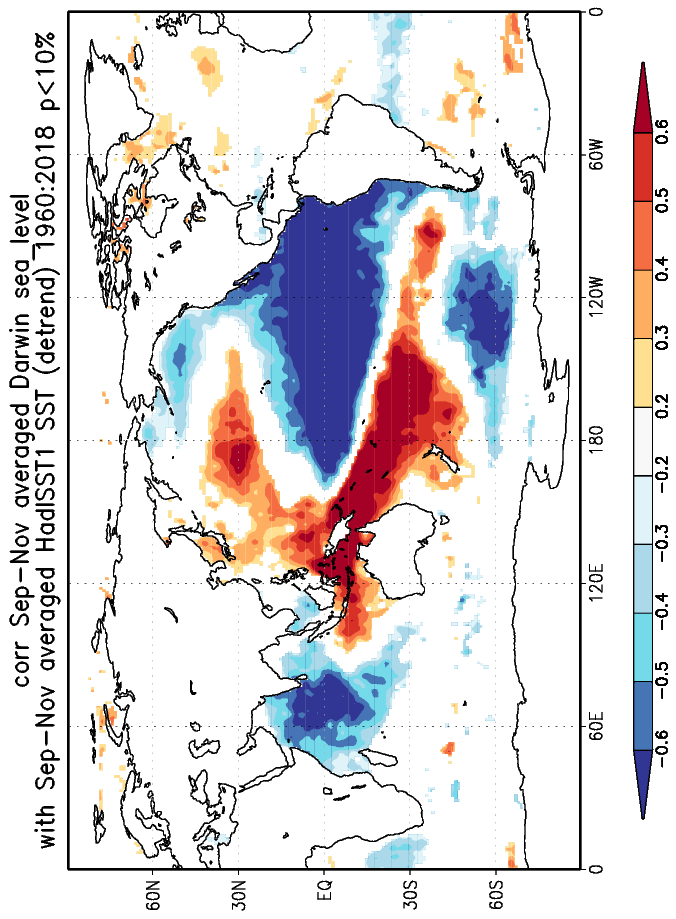
 a

b
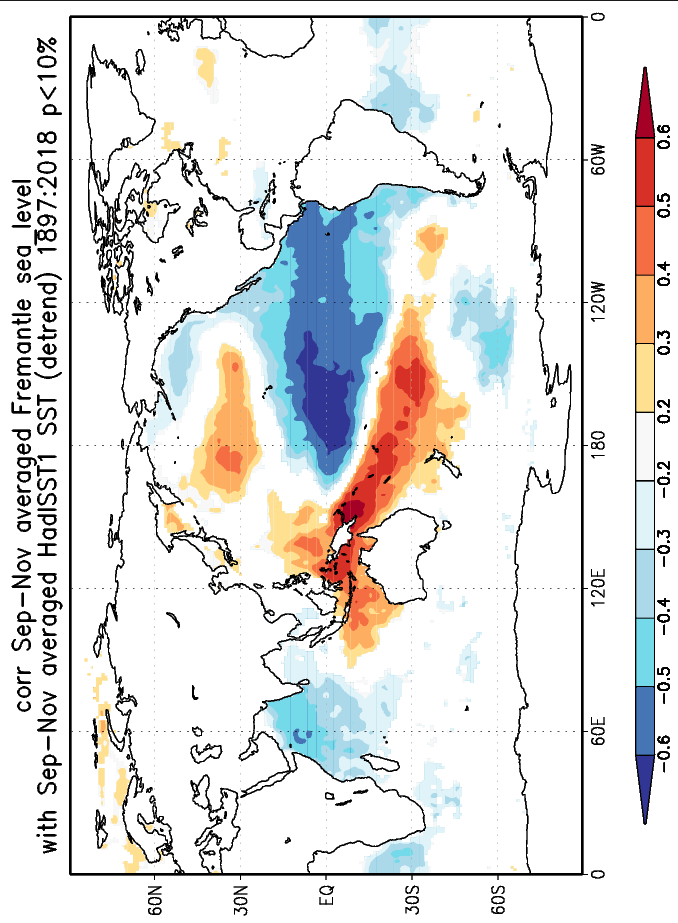

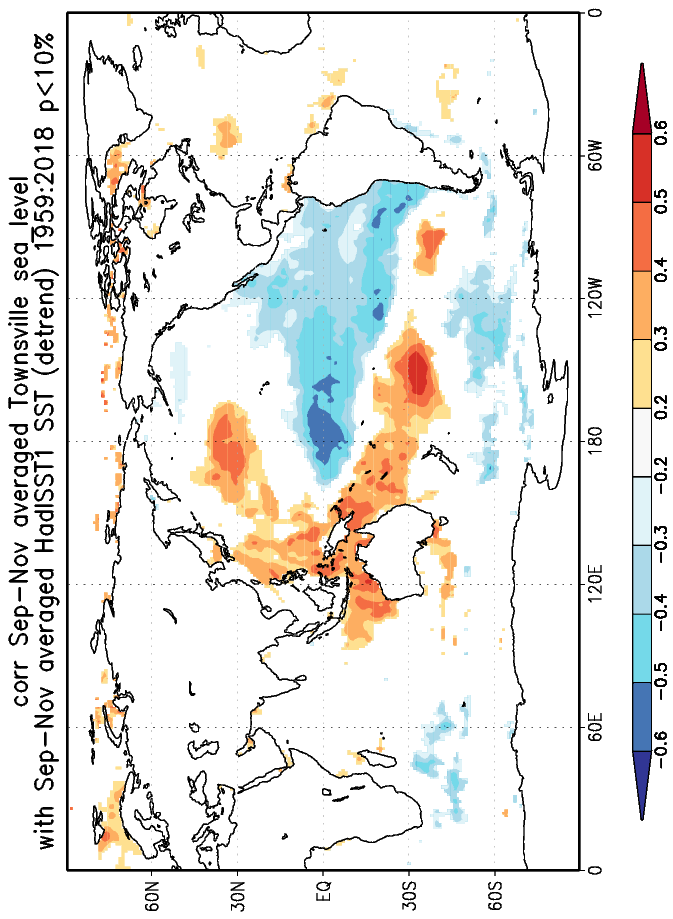
 c

B: OHC


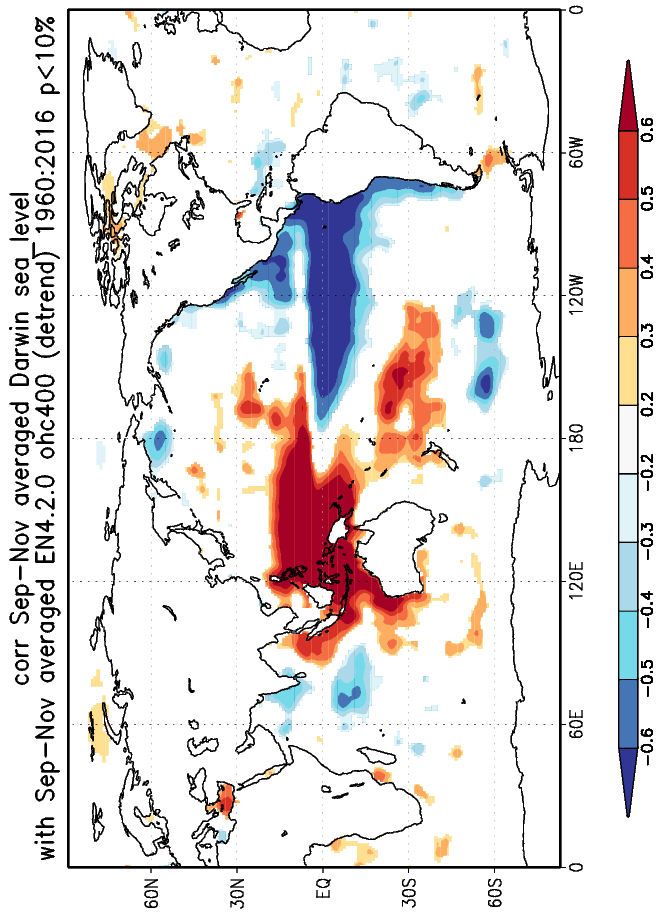
 a

b
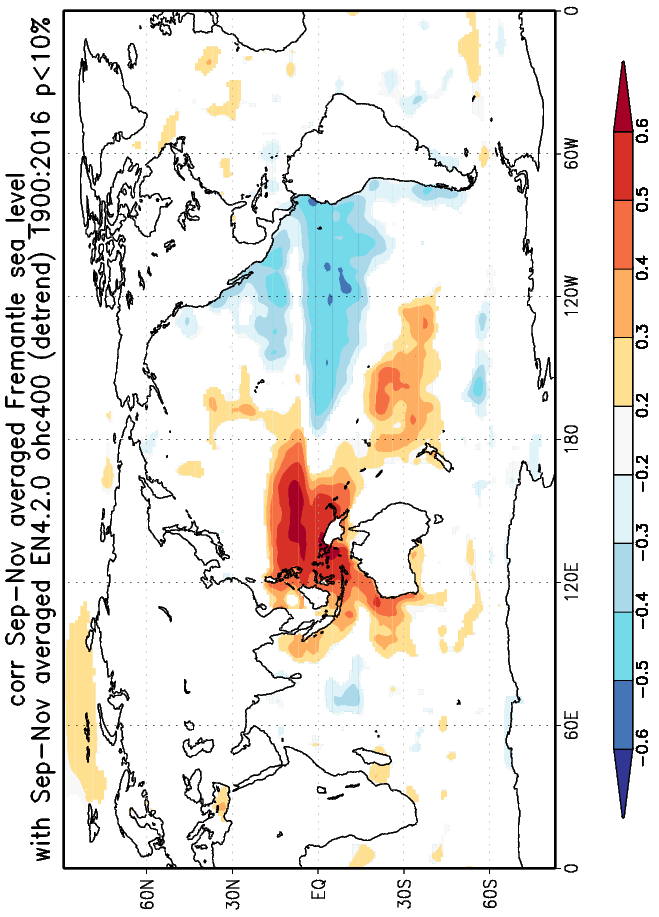

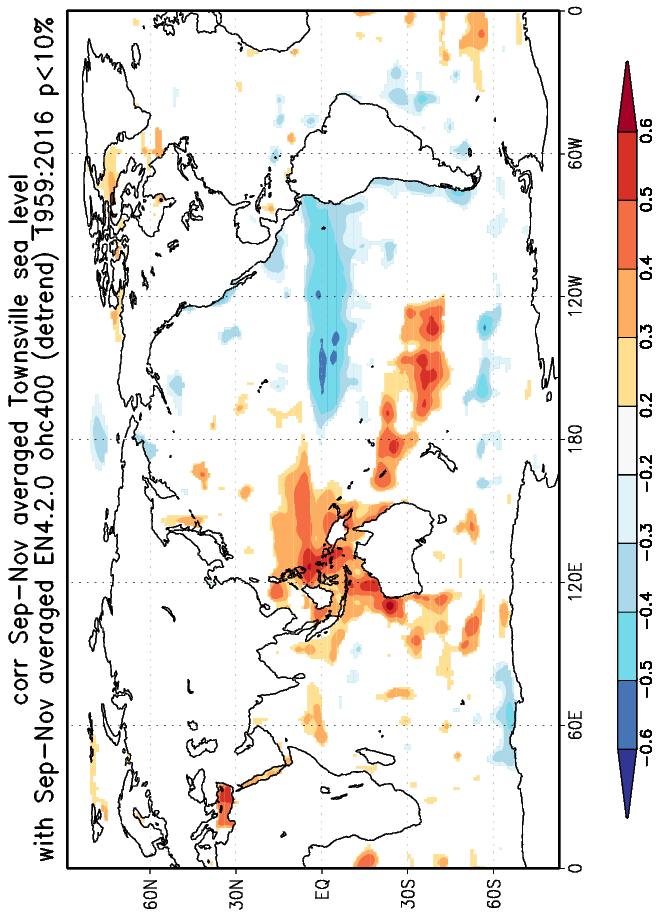
 c

C: SSS


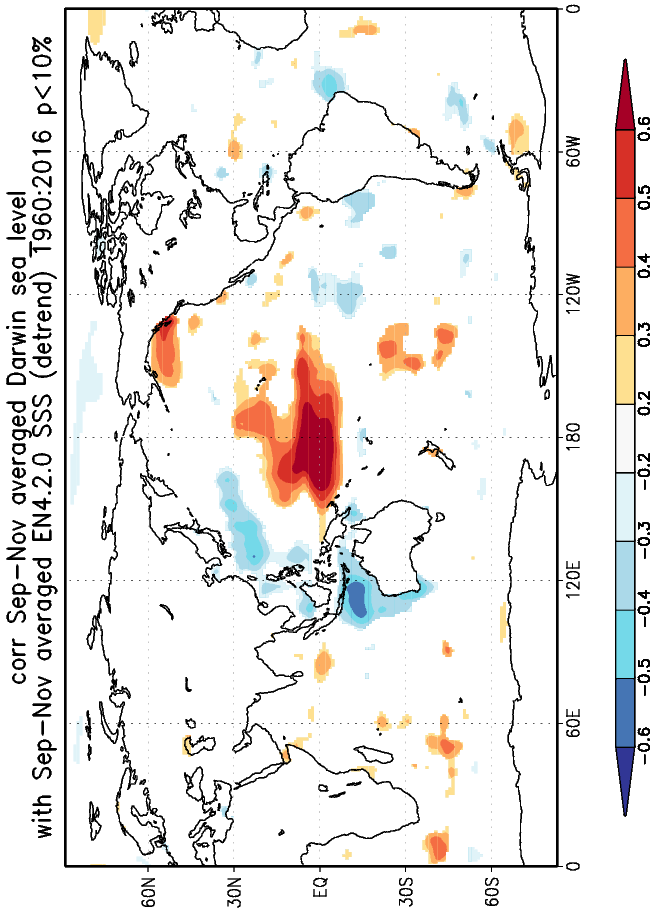
 a

b
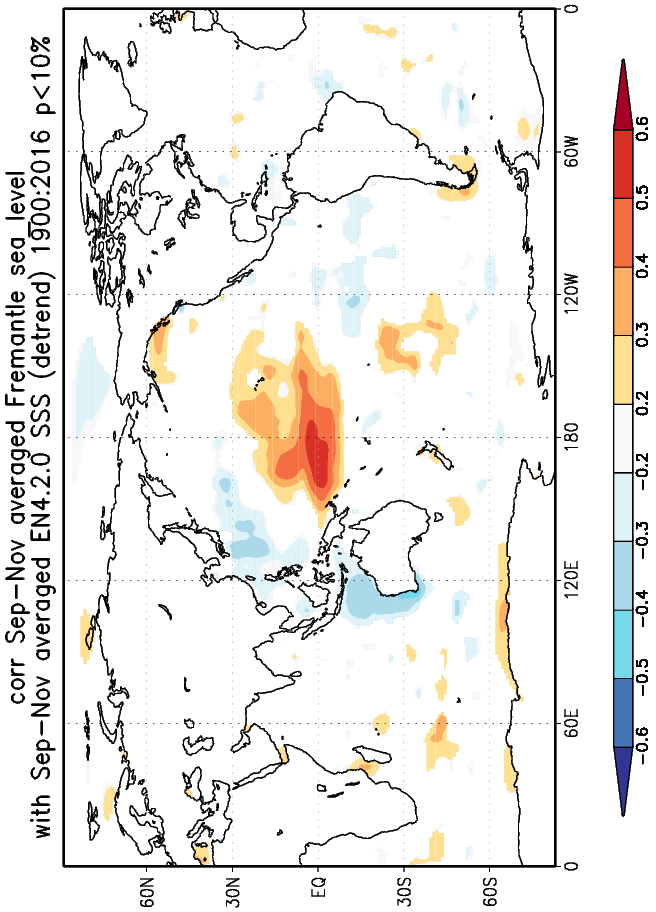

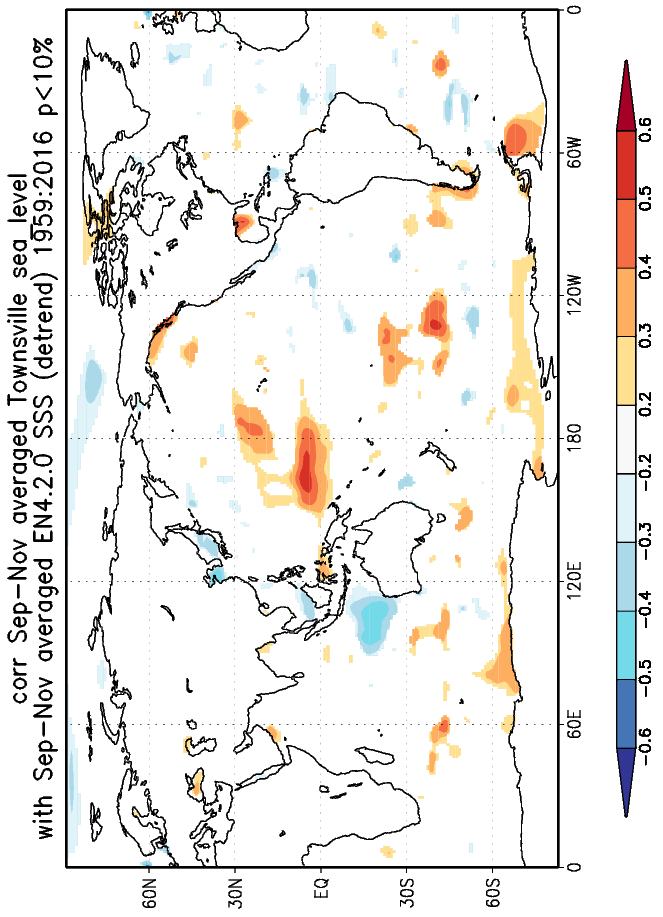
 c


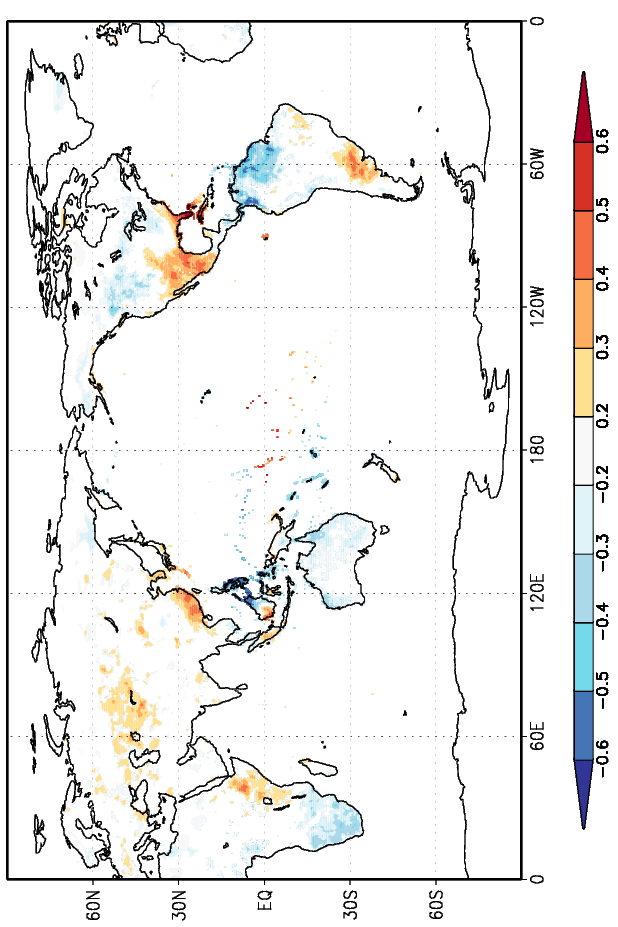


Figure S4. Global correlations between a. Darwin (1959-2018), b. Fremantle (1897-2018) and c. Townsville (1959-2018) sea level with A panels: sea surface temperature (SST), B panels: oceanic heat content (OHC) and C panels: sea surface salinity (SSS) anomalies during the September-November (SON) season p<5%. Correlation values shown in the bar below the panels. (Source: Generated using the KNMI Climate Explorer: <https://climexp.knmi.nl/start.cgi>).

**List of Supplementary Material**

Figure S1. The SOI in the red line (from the Climatic Research Unit [CRU]) and the Niño 4 SST anomalies in the blue line (from NOAA/ESRL/PSD) from January 2013 to December 2017. The extent of the 2014-2016 ‘protracted’ El Niño episode is shown in transparent yellow shading (Source: Global Climate Observing System (GCOS) Working Group on Surface Pressure (WG-SP): Analyze & Plot Long Range Climate Time Series).

Figure S2. Australian Baseline Sea Level Monitoring Project SEAFRAME (SEA-Level Fine Resolution Acoustic Measuring Equipment) tide gauge stations. (Source: Australian Bureau of Meteorology, Australian Baseline Sea Level Monitoring Project: <http://www.bom.gov.au/oceanography/projects/abslmp/abslmp.shtml>).

Figure S3. Power of Morlet 6 wave transform analysis of various instrumental ENSO measures and indices (a. the SOI [1866-2019], b. Niño 3.4 [1854-2019] and c. Niño 4 [1854-2019] SST anomalies) and sea level anomalies at two locations ontheAustralian coast (d. Darwin [1959-2016] and e. Fremantle [1897-2018]). Niño 3.4 and Niño 4 SSTs are from ERSSTv5. (Source: Generated using the KNMI Climate Explorer: <https://climexp.knmi.nl/start.cgi>).

Figure S4. Global correlations between a. Darwin (1959-2018), b. Fremantle (1897-2018) and c. Townsville (1959-2018) sea level with A panels: sea surface temperature (SST), B panels: oceanic heat content (OHC) and C panels: sea surface salinity (SSS) anomalies during the September-November (SON) season p<5%. Correlation values shown in the bar below the panels. (Source: Generated using the KNMI Climate Explorer: <https://climexp.knmi.nl/start.cgi>).
